## Simulator Training Enhances Resident Performance in Transesophageal Echocardiography: Erratum

In the January 2014 issue, the article “Simulator Training Enhances Resident Performance in Transesophageal Echocardiography” (Ferrero NA, Bortsov AV, Arora H, Martinelli SM, Kolarczyk LM, Teeter EC, Zvara DA, Kumar PA: *ANESTHESIOLOGY* 2014; 120:149–59) lists an incorrect middle initial for coauthor Emily Teeter. Dr. Teeter’s middle initial should have been listed as “G,” not “C.”

The authors regret the error.

DOI: 10.1097/ALN.0000000000002943

## Reference

Ferrero NA, Bortsov AV, Arora H, Martinelli SM, Kolarczyk LM, Teeter EC, Zvara DA, Kumar PA: Simulator training enhances resident performance in transesophageal echocardiography. *ANESTHESIOLOGY* 2014; 120:149–59. doi: 10.1097/ALN.0000000000000063.
